# Supplementary material
Source: Springer Nature journal article supplement (https://www.springermedizin.de/resource/supplementary/12913_2006_312_MOESM4_ESM.pdf/9534466)
Supplement: MOESM4 [file 9534466]

**NHRS Goals**

- Advance scientific knowledge
- Promote utilization of knowledge to improve health and health equity

**STEWARDSHIP**

- National health policy
- National strategic health plan
- National health research policy
- National health research legislation
- Strategic health research plan
- National health research programme
- National health research management forum
  - Ethical review committee
  - Institutional review committee
- National health research focal point
- National network of health research & development
- Codes of conduct, ethical standards & guidelines

**CREATING & SUSTAINING RESOURCES**

- National universities faculties of health sciences, medical schools, schools of public health
- National health research institutes/medical research councils
- Nongovernmental health research organizations
- National health information systems
- Schools of traditional medicine

**PRODUCING & USING RESEARCH**

- Scientific publications in peer-reviewed & non-peer reviewed literature, reports, monographs, books, policy briefs
- Translation & communication of research to inform decision-making, policy, strategies, practises & public opinion
- Promotion of the use of research in development of new tools to improve health

**FINANCING**

- Health research funding from domestic (government taxes, NGOs, private sector contributions) & external (bilateral and multilateral donors, international NGOs) sources
